# Supplementary material for: PMCAMx-2015 evaluation over Europe against AERONET and MODIS aerosol optical depth measurements
Source: Copernicus journal article supplement (doi:10.5194/gmd-2015-225), 2016-01-18
Supplement: Supplementary file 1 [file gmd-2015-225-supplement.pdf]

## Supplementary Information

**Table S1.** PM<sub>2.5</sub> aerosol concentrations (in  $\mu\text{g}/\text{m}^3$ ) at the boundaries of the domain.

| Species         | Boundaries <sup>1</sup> |       |       |       |
|-----------------|-------------------------|-------|-------|-------|
|                 | North                   | South | West  | East  |
| OA <sup>2</sup> | 1                       | 1     | 1     | 1     |
| Sulfate         | 1                       | 1     | 1     | 1     |
| Ammonium        | 0.37                    | 0.37  | 0.37  | 0.37  |
| Nitrate         | 0.06                    | 0.015 | 0.007 | 0.06  |
| Sodium          | 0.001                   | 0.003 | 0.05  | 0.018 |
| Chloride        | 0.001                   | 0.006 | 0.06  | 0.009 |

<sup>1</sup> "North", "South", "West", and "East" here represent the top, bottom, left, and right edge, respectively, of our modeling domain.

<sup>2</sup> organic aerosol

**Table S2.** Summary of the evaluation of MODIS vs. AERONET AODs at 550nm for land, per satellite and Quality Confidence Flag (QAC).

| Satellite      | QAC | Collocated Points | Regression equation <sup>1</sup> | Correlation Coefficient | % points in expected error envelope |
|----------------|-----|-------------------|----------------------------------|-------------------------|-------------------------------------|
| Aqua and Terra | 123 | 8,331             | $y = 1.046 x - 0.0001$           | 0.81                    | 72.7                                |
|                | 23  | 7,226             | $y = 1.027 x - 0.003$            | 0.82                    | 74.0                                |
|                | 3   | 5,544             | $y = 0.976 x - 0.004$            | 0.83                    | 75.5                                |
| Aqua           | 123 | 3,721             | $y = 1.057 x + 0.002$            | 0.79                    | 71.1                                |
| Terra          | 123 | 4,592             | $y = 1.039 x - 0.002$            | 0.82                    | 73.9                                |

<sup>1</sup>x is AERONET AOD and y is MODIS AOD

**Table S3.** Expected error values which describe MODIS AOD uncertainties (land and ocean algorithms) with respect to AERONET. The monthly mean value of AERONET AOD is employed for  $AOD_{AERONET}$ .

| Region                          | $\pm(0.05+0.15AOD_{AERONET})$<br>Land | $\pm(0.03+0.05AOD_{AERONET})$<br>Ocean |
|---------------------------------|---------------------------------------|----------------------------------------|
| UK and Ireland                  | $\pm 0.09$                            | -                                      |
| Central Europe                  | $\pm 0.07$                            | -                                      |
| North Europe                    | $\pm 0.06$                            | -                                      |
| Spain and Portugal              | $\pm 0.07$                            | -                                      |
| East Europe                     | $\pm 0.07$                            | -                                      |
| Balkans                         | $\pm 0.08$                            | -                                      |
| Russia, Belarus,<br>and Ukraine | $\pm 0.08$                            | -                                      |
| Turkey and<br>Northern Africa   | $\pm 0.08$                            | -                                      |
| Mediterranean Sea               | -                                     | $\pm 0.04$                             |
| North Atlantic Ocean            | -                                     | $\pm 0.04$                             |
| South Atlantic Ocean            | -                                     | $\pm 0.04$                             |
| Black Sea                       | -                                     | $\pm 0.04$                             |

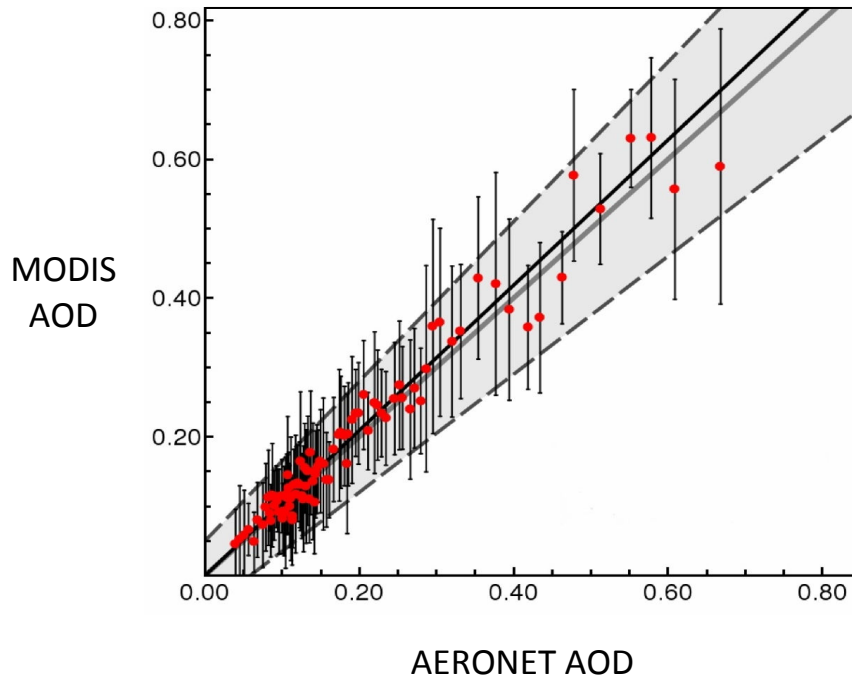

**Fig S1** Comparison of MODIS AODs over land at 550 nm from Aqua and Terra ( $QAC \geq 1$ ) with AERONET AODs. The mean AERONET and MODIS values for each bin are denoted by the red dots. The collocated MODIS data standard deviation, for each bin, is illustrated by the vertical error bars. The solid black line is the regression equation  $y = -0.0001 + 1.046x$  calculated prior to data partitioning, along with the 1:1 solid gray line. The dashed gray lines denote the land expected error envelope of  $\pm(0.05 + 0.15AOD_{AERONET})$ .

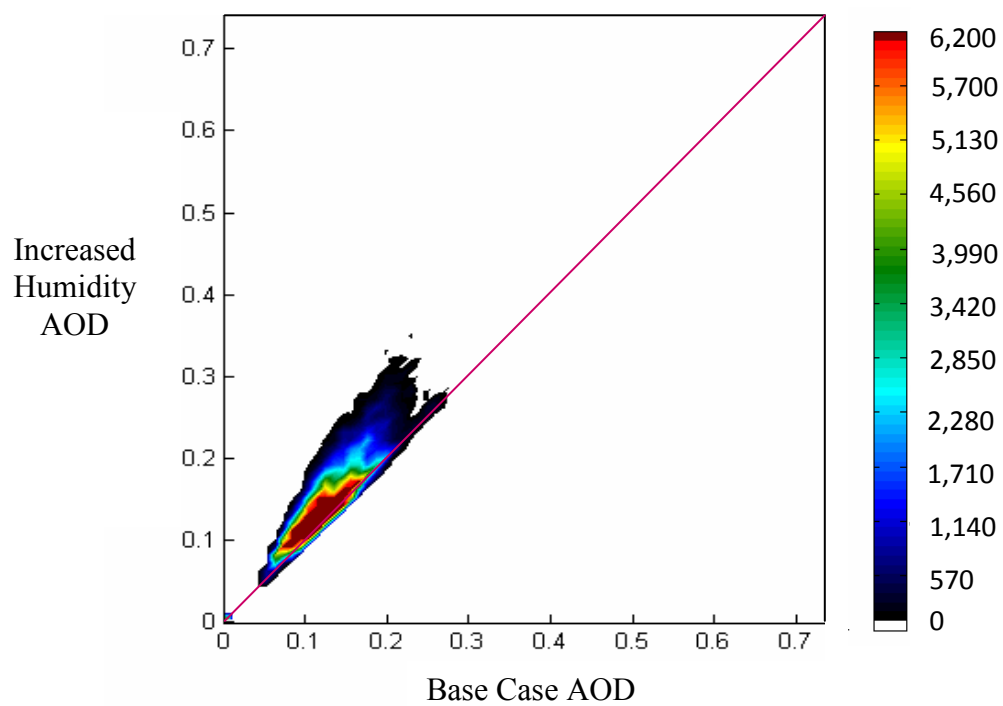

**Fig S2** Comparison of the base case PMCAMx with the humidity test PMCAMx monthly mean AODs. The different colors indicate density.
